# Supplementary material
Source: Springer Nature journal article supplement (https://www.springermedizin.de/resource/supplementary/10194_2013_573_MOESM1_ESM.pdf/9422702)

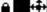

86 BPM

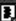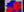

26/6/07 11:19:23 am

64 of 82

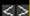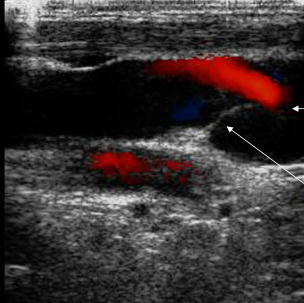

insufficiency  
jet

valve

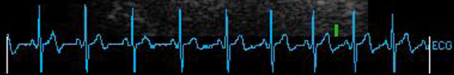

Supplement: MOESM1 [file 9422702]
